# Supplementary material
Source: publisher figshare collection journal article supplement (https://acs.figshare.com/ndownloader/files/10003864)
Supplement: Supplementary file 1 [file 10003864]

## Supporting Information

### **Intracellular Delivery of $\beta$ -galactosidase Enzyme using Arginase responsive Dextran sulphate/Poly-L-arginine capsule for Lysosomal Storage Disorder**

*Meenakshi Gupta<sup>a,b</sup>, Himanshu Pandey<sup>b</sup>, Sri Sivakumar<sup>c,\*</sup>*

<sup>a</sup> Institute of Pharmacy, Chhatrapati Shahu Ji Maharaj University, Kanpur, Uttar Pradesh-208024, India.

<sup>b</sup> Department of Pharmaceutical Sciences, Sam Higginbottom University of Agriculture, Technology and Sciences, Allahabad, Uttar Pradesh -211007, India

<sup>c</sup> Department of Chemical Engineering, Material Science programme, Centre for Nanoscience and Soft Nanotechnology, Centre for Environmental Science and Engineering, Indian Institute of Technology Kanpur, Kanpur, Uttar Pradesh-208016, India.

\* Corresponding author, email address: srisiva@iitk.ac.in. Tel: +91-512-2597697. Fax: 91-5122590104.

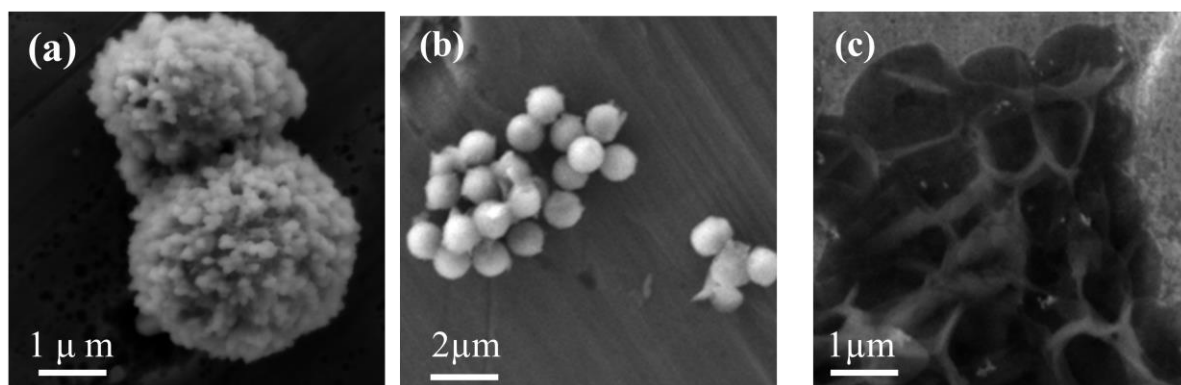

**Figure S1.** (a)SEM image of calcium carbonate template, (b) SEM image of APTES functionalized silica template and (c) SEM image of PSS/PAH capsules

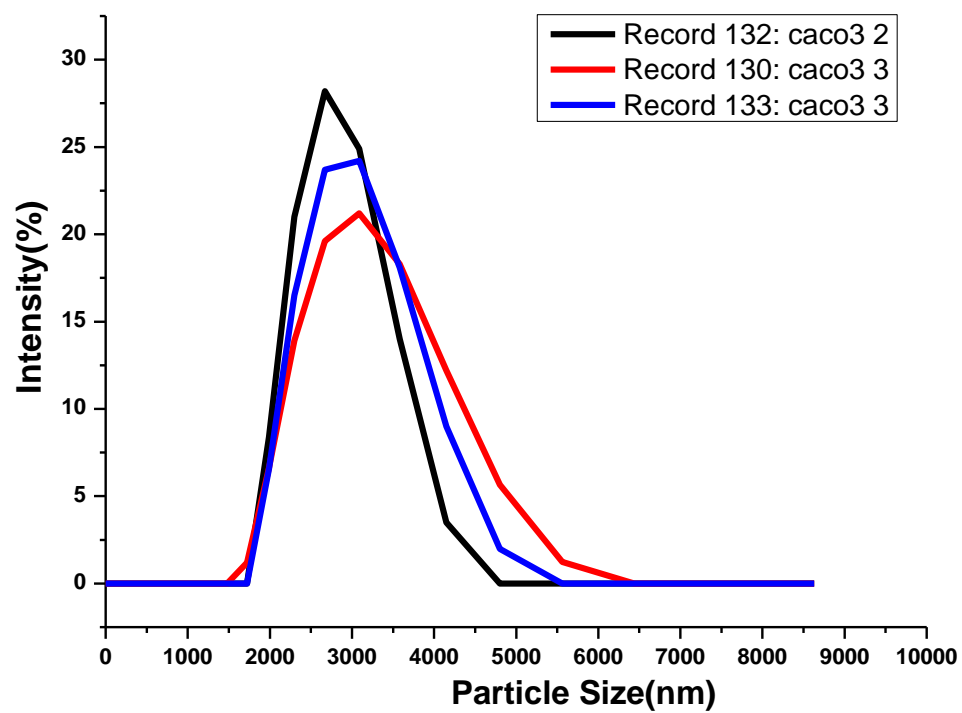

**Figure S2.** Particle Size of calcium carbonate template by dynamic light scattering

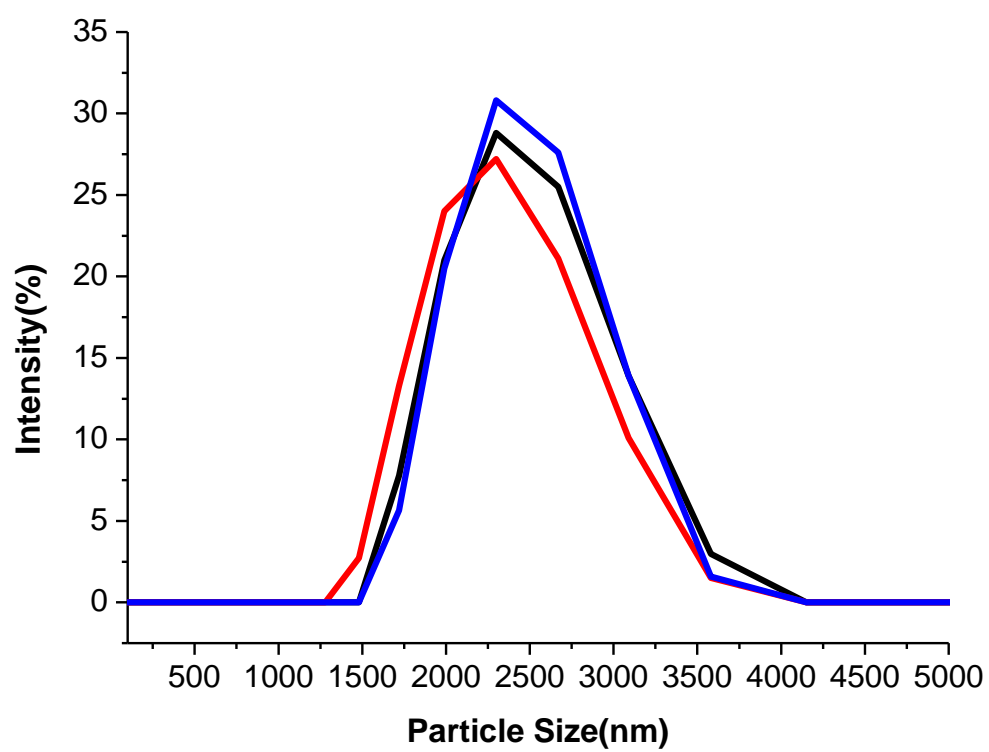

**Figure S3.** Particle Size of DS/PA capsules by dynamic light scattering

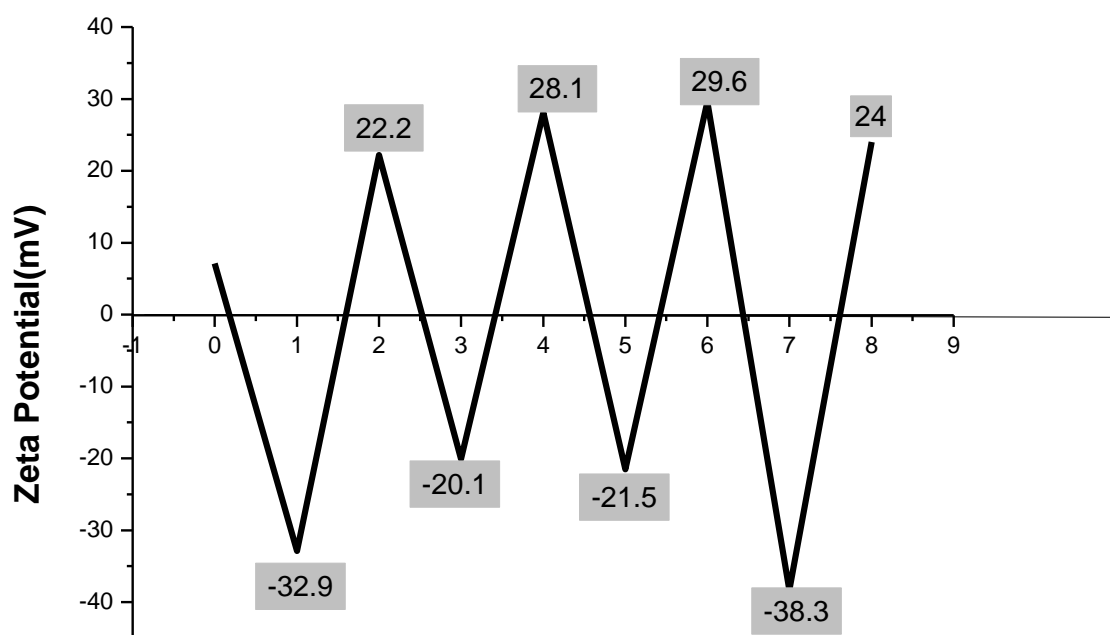

#### Alternating Layers of Positive & Negative charged Polymer

**Figure S4.** Illustration of change in zeta potential of DS/PA capsules while layer by layer assembly in water showing alternating positive and negative charges. Layer 1<sup>st</sup>, 3<sup>rd</sup>, 5<sup>th</sup> and 7<sup>th</sup>: negatively charge (dextran sulphate). Layer 2<sup>nd</sup>, 4<sup>th</sup>, 6<sup>th</sup> and 8<sup>th</sup>: positively charge (poly-l-arginine) applied on  $\beta$ -gal coated calcium carbonate template.

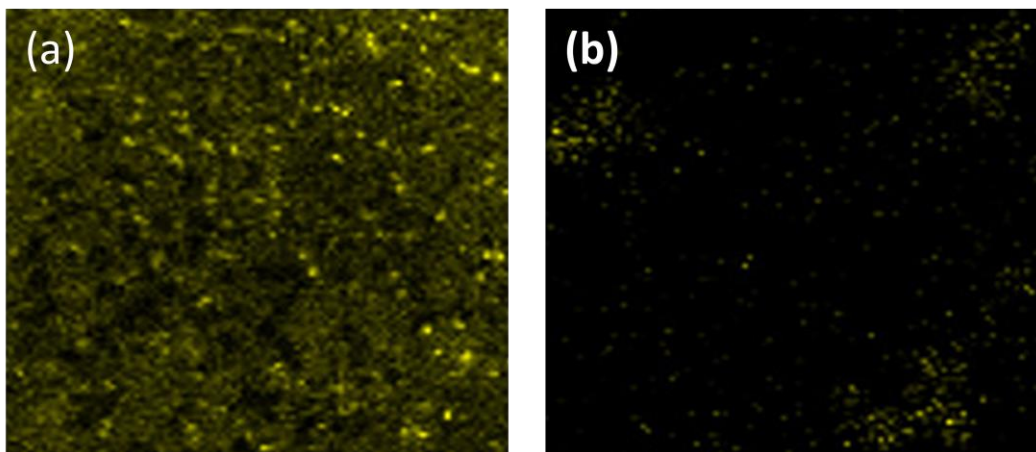

**Figure S5:**  $\beta$ -gal enzyme–substrate (ONPG) reaction inside the capsules for confirmation of  $\beta$ -gal enzyme encapsulation inside (a) DS/PA capsules and (b) PSS/PAH capsules

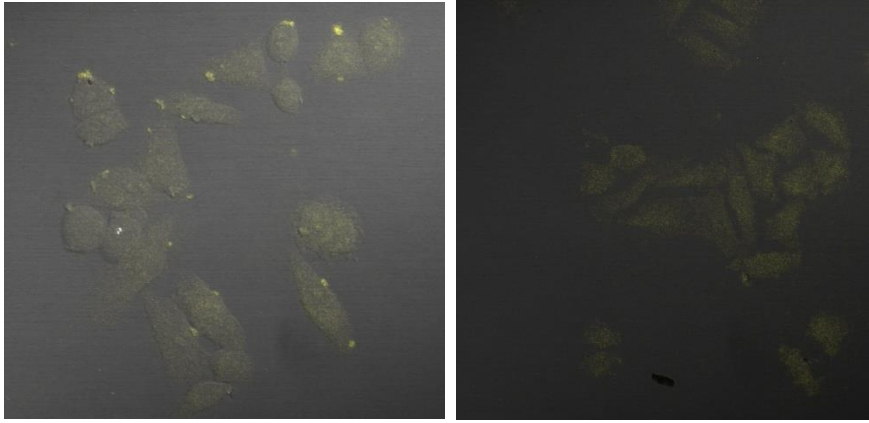

**Figure S6:** Confocal microscopy images of  $\beta$ -gal enzyme release from  $\beta$ -gal DS/PA capsule in HeLa cells at 4h time point

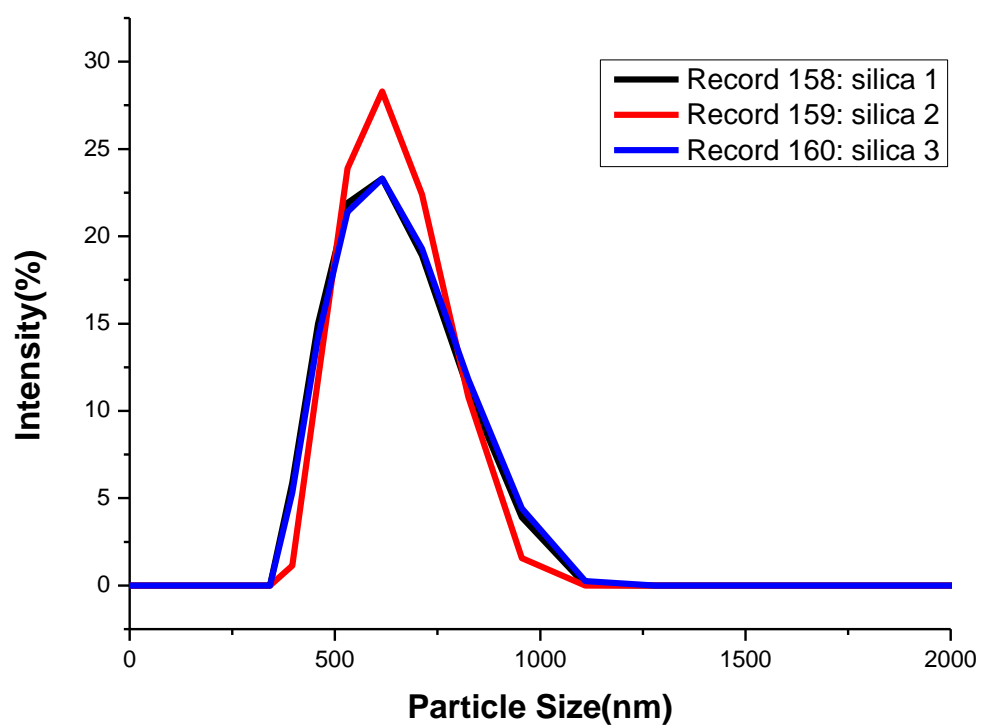

**Figure S7:** Particle size of APTES functionalized silica particles by dynamic light scattering



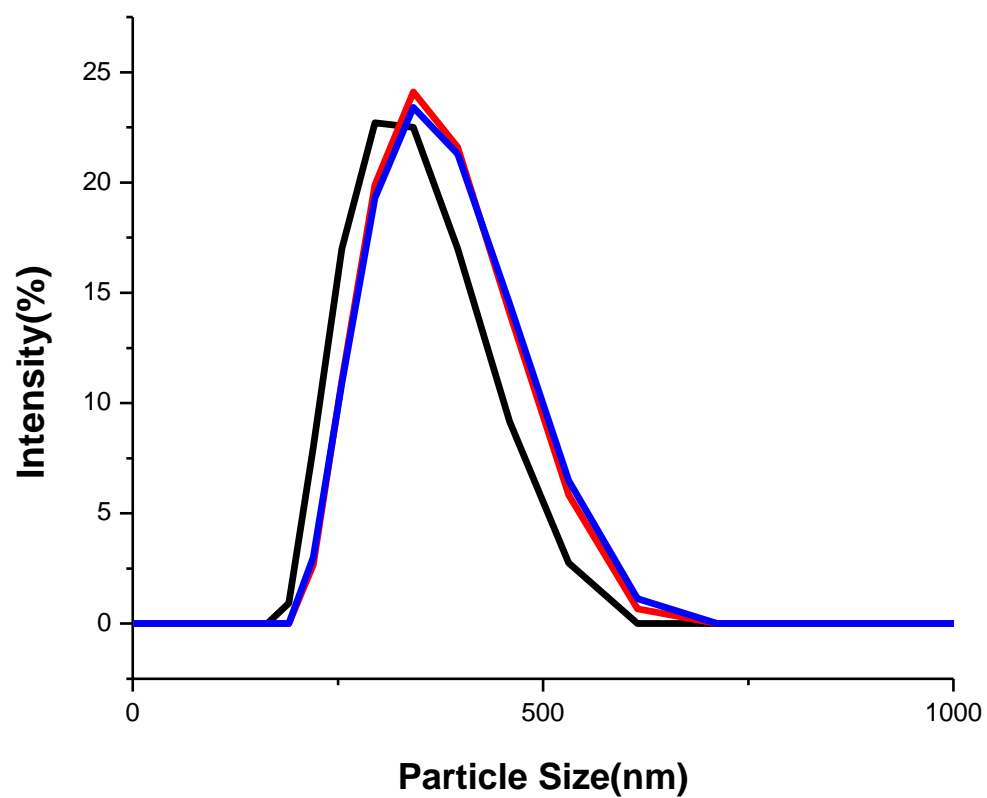

**Figure S8:** Particle Size of PSS/PAH LBL capsules by Dynamic Light Scattering
